# Supplementary material
Source: publisher figshare collection journal article supplement (https://karger.figshare.com/ndownloader/files/13628648)
Supplement: Supplementary file 1 [file 13628648]

## Sheet: Sheet1
Scoring system
Overall QoL	Questions 1-19
achievable points	translated to	percentage
Uds // preoperative
77-69 // 66-59		>90%
68-61 // 58-52		>80%
60-53 // 51-46		>70%
52-46 // 45-39		>60%
<45 // 38		>50%
